# Supplementary material
Source: PubMed Central journal article supplement (PMC523110)
Supplement: bmj_38238.508021.F7_2.pdf [file bmj_38238.508021.F7_2.pdf]

## The full results and details of excluded local authorities

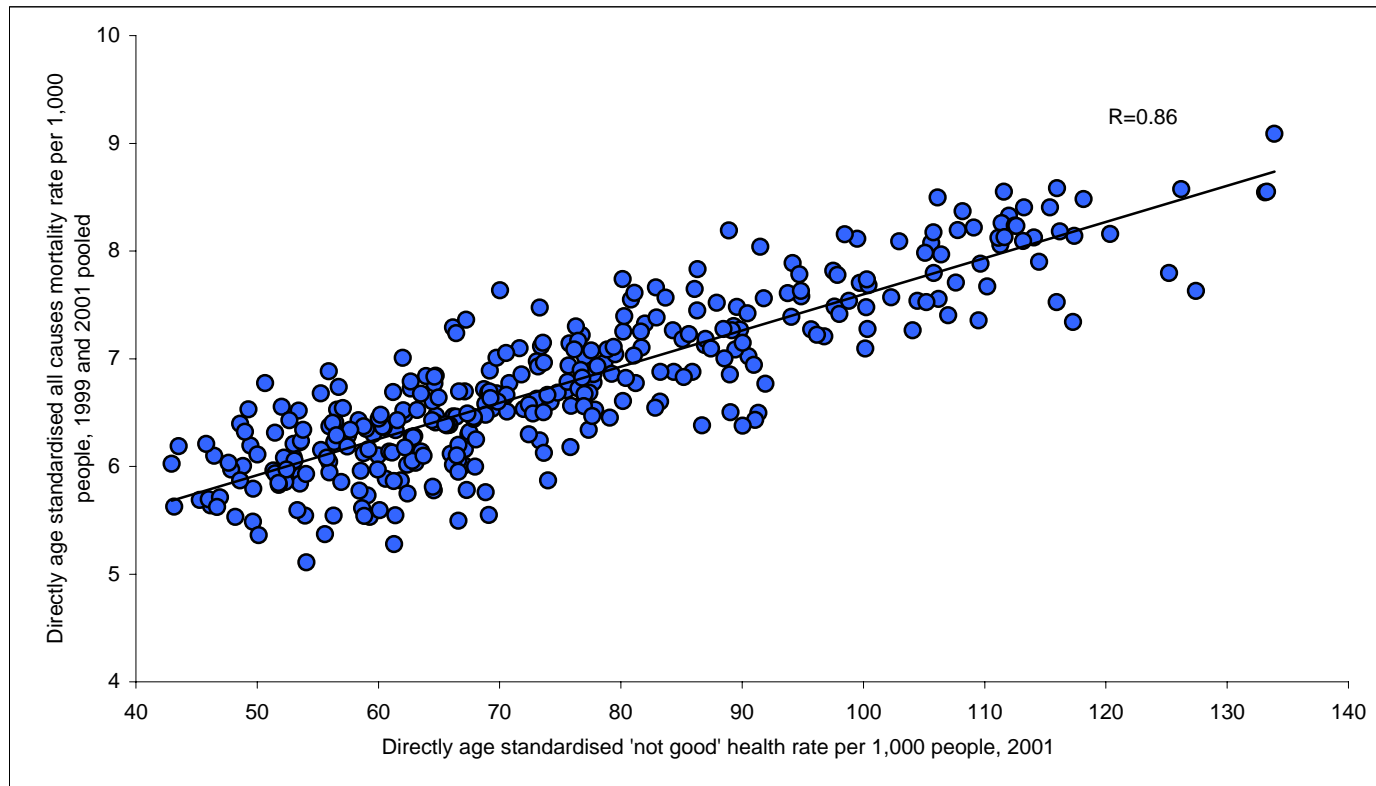

| Area code | Area name              | 'Not good'<br>health rate | All causes<br>mortality rate |
|-----------|------------------------|---------------------------|------------------------------|
| 00AB      | Barking and Dagenham   | 105.8                     | 7.8                          |
| 00AC      | Barnet                 | 67.1                      | 6.0                          |
| 00AD      | Bexley                 | 66.2                      | 6.5                          |
| 00AE      | Brent                  | 91.4                      | 6.5                          |
| 00AF      | Bromley                | 58.8                      | 6.1                          |
| 00AG      | Camden                 | 98.8                      | 7.5                          |
| 00AH      | Croydon                | 73.1                      | 6.6                          |
| 00AJ      | Ealing                 | 85.9                      | 6.9                          |
| 00AK      | Enfield                | 80.2                      | 6.6                          |
| 00AL      | Greenwich              | 94.9                      | 7.6                          |
| 00AM      | Hackney                | 127.4                     | 7.6                          |
| 00AN      | Hammersmith and Fulham | 91.9                      | 6.8                          |
| 00AP      | Haringey               | 100.3                     | 7.3                          |
| 00AQ      | Harrow                 | 64.6                      | 5.8                          |
| 00AR      | Havering               | 69.2                      | 6.6                          |
| 00AS      | Hillingdon             | 70.2                      | 6.6                          |
| 00AT      | Hounslow               | 84.3                      | 7.3                          |
| 00AU      | Islington              | 120.4                     | 8.2                          |
| 00AX      | Kingston upon Thames   | 58.4                      | 6.4                          |
| 00AY      | Lambeth                | 97.5                      | 7.8                          |
| 00AZ      | Lewisham               | 91.5                      | 8.0                          |
| 00BA      | Merton                 | 69.4                      | 6.5                          |
| 00BB      | Newham                 | 126.2                     | 8.6                          |
| 00BC      | Redbridge              | 79.1                      | 6.5                          |
| 00BD      | Richmond upon Thames   | 52.7                      | 6.0                          |
| 00BE      | Southwark              | 99.7                      | 7.7                          |
| 00BF      | Sutton                 | 64.7                      | 6.8                          |
| 00BG      | Tower Hamlets          | 133.1                     | 8.5                          |
| 00BH      | Waltham Forest         | 94.2                      | 7.9                          |
| 00BJ      | Wandsworth             | 80.2                      | 7.7                          |
| 00BL      | Bolton                 | 100.4                     | 7.7                          |
| 00BM      | Bury                   | 89.6                      | 7.5                          |
| 00BP      | Oldham                 | 105.6                     | 8.1                          |
| 00BQ      | Rochdale               | 106.1                     | 8.5                          |
| 00BR      | Salford                | 116.0                     | 8.6                          |
| 00BS      | Stockport              | 77.7                      | 6.8                          |
| 00BT      | Tameside               | 105.8                     | 8.2                          |
| 00BU      | Trafford               | 78.7                      | 7.0                          |

|      |                             |       |     |
|------|-----------------------------|-------|-----|
| 00BW | Wigan                       | 108.2 | 8.4 |
| 00BX | Knowsley                    | 133.3 | 8.6 |
| 00BY | Liverpool                   | 133.9 | 9.1 |
| 00BZ | St. Helens                  | 114.1 | 8.1 |
| 00CA | Sefton                      | 93.8  | 7.6 |
| 00CB | Wirral                      | 97.6  | 7.5 |
| 00CC | Barnsley                    | 125.2 | 7.8 |
| 00CE | Doncaster                   | 106.2 | 7.6 |
| 00CF | Rotherham                   | 107.0 | 7.4 |
| 00CG | Sheffield                   | 100.2 | 7.1 |
| 00CH | Gateshead                   | 113.2 | 8.1 |
| 00CJ | Newcastle upon Tyne         | 111.3 | 8.1 |
| 00CK | North Tyneside              | 95.7  | 7.3 |
| 00CL | South Tyneside              | 109.7 | 7.9 |
| 00CM | Sunderland                  | 118.2 | 8.5 |
| 00CN | Birmingham                  | 107.6 | 7.7 |
| 00CQ | Coventry                    | 94.1  | 7.4 |
| 00CR | Dudley                      | 85.1  | 7.2 |
| 00CS | Sandwell                    | 107.8 | 8.2 |
| 00CT | Solihull                    | 67.1  | 6.2 |
| 00CU | Walsall                     | 98.0  | 7.4 |
| 00CW | Wolverhampton               | 104.5 | 7.5 |
| 00CX | Bradford                    | 97.9  | 7.8 |
| 00CY | Calderdale                  | 86.9  | 7.1 |
| 00CZ | Kirklees                    | 89.3  | 7.3 |
| 00DA | Leeds                       | 90.5  | 7.0 |
| 00DB | Wakefield                   | 110.2 | 7.7 |
| 00EB | Hartlepool                  | 112.0 | 8.3 |
| 00EC | Middlesbrough               | 111.4 | 8.3 |
| 00EE | Redcar and Cleveland        | 105.2 | 7.5 |
| 00EF | Stockton-on-Tees            | 94.7  | 7.8 |
| 00EH | Darlington                  | 86.3  | 7.8 |
| 00ET | Halton                      | 111.6 | 8.6 |
| 00EU | Warrington                  | 82.0  | 7.3 |
| 00EX | Blackburn with Darwen       | 112.5 | 8.2 |
| 00EY | Blackpool                   | 115.4 | 8.4 |
| 00FA | Kingston upon Hull; City of | 106.4 | 8.0 |
| 00FB | East Riding of Yorkshire    | 68.8  | 6.6 |
| 00FC | North East Lincolnshire     | 81.6  | 7.3 |
| 00FD | North Lincolnshire          | 81.7  | 7.1 |
| 00FF | York                        | 67.4  | 6.3 |

|      |                              |       |     |
|------|------------------------------|-------|-----|
| 00FK | Derby                        | 89.8  | 7.3 |
| 00FN | Leicester                    | 105.1 | 8.0 |
| 00FP | Rutland                      | 49.7  | 5.5 |
| 00FY | Nottingham                   | 113.3 | 8.4 |
| 00GA | Herefordshire; County of     | 66.0  | 6.1 |
| 00GF | Telford and Wrekin           | 90.4  | 7.4 |
| 00GL | Stoke-on-Trent               | 117.4 | 8.1 |
| 00HA | Bath and North East Somerset | 60.6  | 5.9 |
| 00HB | Bristol; City of             | 87.0  | 7.2 |
| 00HC | North Somerset               | 66.6  | 6.2 |
| 00HD | South Gloucestershire        | 61.9  | 5.9 |
| 00HG | Plymouth                     | 91.0  | 6.9 |
| 00HH | Torbay                       | 86.7  | 6.4 |
| 00HN | Bournemouth                  | 77.4  | 6.7 |
| 00HP | Poole                        | 68.8  | 5.8 |
| 00HX | Swindon                      | 71.7  | 7.1 |
| 00JA | Peterborough                 | 80.2  | 7.3 |
| 00KA | Luton                        | 82.9  | 7.7 |
| 00KF | Southend-on-Sea              | 77.3  | 6.9 |
| 00KG | Thurrock                     | 75.8  | 7.1 |
| 00LC | Medway                       | 73.3  | 7.5 |
| 00MA | Bracknell Forest             | 55.9  | 6.9 |
| 00MB | West Berkshire               | 49.5  | 6.2 |
| 00MC | Reading                      | 64.8  | 6.5 |
| 00MD | Slough                       | 83.7  | 7.6 |
| 00ME | Windsor and Maidenhead       | 49.3  | 6.5 |
| 00MF | Wokingham                    | 43.5  | 6.2 |
| 00MG | Milton Keynes                | 73.4  | 7.1 |
| 00ML | Brighton and Hove            | 81.1  | 7.0 |
| 00MR | Portsmouth                   | 80.3  | 7.4 |
| 00MS | Southampton                  | 84.4  | 6.9 |
| 00MW | Isle of Wight                | 73.3  | 6.2 |
| 09UC | Mid Bedfordshire             | 53.5  | 6.2 |
| 09UD | Bedford                      | 66.4  | 6.5 |
| 09UE | South Bedfordshire           | 62.0  | 7.0 |
| 11UB | Aylesbury Vale               | 53.4  | 6.5 |
| 11UC | Chiltern                     | 42.9  | 6.0 |
| 11UE | South Bucks                  | 46.5  | 6.1 |
| 11UF | Wycombe                      | 53.0  | 6.1 |
| 12UB | Cambridge                    | 63.2  | 6.1 |
| 12UC | East Cambridgeshire          | 58.6  | 6.0 |

|      |                           |       |     |
|------|---------------------------|-------|-----|
| 12UD | Fenland                   | 76.8  | 7.2 |
| 12UE | Huntingdonshire           | 56.7  | 6.3 |
| 12UG | South Cambridgeshire      | 48.2  | 5.5 |
| 13UB | Chester                   | 69.2  | 6.9 |
| 13UC | Congleton                 | 64.5  | 6.6 |
| 13UD | Crewe and Nantwich        | 76.3  | 7.3 |
| 13UE | Ellesmere Port and Neston | 83.2  | 6.6 |
| 13UG | Macclesfield              | 59.6  | 6.3 |
| 13UH | Vale Royal                | 77.0  | 7.0 |
| 15UB | Caradon                   | 73.6  | 6.1 |
| 15UC | Carrick                   | 74.0  | 5.9 |
| 15UD | Kerrier                   | 89.0  | 6.5 |
| 15UE | North Cornwall            | 75.8  | 6.2 |
| 15UF | Penwith                   | 91.1  | 6.4 |
| 15UG | Restormel                 | 82.8  | 6.5 |
| 16UB | Allerdale                 | 80.8  | 7.5 |
| 16UC | Barrow-in-Furness         | 115.9 | 7.5 |
| 16UD | Carlisle                  | 81.1  | 7.6 |
| 16UE | Copeland                  | 89.2  | 7.3 |
| 16UF | Eden                      | 63.0  | 6.3 |
| 16UG | South Lakeland            | 63.3  | 6.1 |
| 17UB | Amber Valley              | 83.3  | 6.9 |
| 17UC | Bolsover                  | 117.3 | 7.3 |
| 17UD | Chesterfield              | 102.3 | 7.6 |
| 17UF | Derbyshire Dales          | 62.2  | 6.5 |
| 17UG | Erewash                   | 79.5  | 7.0 |
| 17UH | High Peak                 | 75.5  | 6.7 |
| 17UJ | North East Derbyshire     | 89.0  | 6.9 |
| 17UK | South Derbyshire          | 76.5  | 7.2 |
| 18UB | East Devon                | 59.3  | 5.5 |
| 18UC | Exeter                    | 74.2  | 6.6 |
| 18UD | Mid Devon                 | 61.3  | 5.9 |
| 18UE | North Devon               | 68.7  | 6.7 |
| 18UG | South Hams                | 61.4  | 5.5 |
| 18UH | Teignbridge               | 66.6  | 6.1 |
| 18UK | Torridge                  | 74.8  | 6.7 |
| 18UL | West Devon                | 62.4  | 6.0 |
| 19UC | Christchurch              | 66.6  | 5.5 |
| 19UD | East Dorset               | 54.1  | 5.1 |
| 19UE | North Dorset              | 55.6  | 5.4 |
| 19UG | Purbeck                   | 61.3  | 5.3 |

|      |                       |       |     |
|------|-----------------------|-------|-----|
| 19UH | West Dorset           | 59.1  | 5.7 |
| 19UJ | Weymouth and Portland | 77.0  | 6.6 |
| 20UB | Chester-le-Street     | 100.2 | 7.5 |
| 20UD | Derwentside           | 114.5 | 7.9 |
| 20UE | Durham                | 96.8  | 7.2 |
| 20UG | Sedgefield            | 116.2 | 8.2 |
| 20UH | Teesdale              | 75.6  | 6.8 |
| 20UJ | Wear Valley           | 109.1 | 8.2 |
| 21UC | Eastbourne            | 77.9  | 6.5 |
| 21UD | Hastings              | 96.2  | 7.2 |
| 21UF | Lewes                 | 64.5  | 5.8 |
| 21UG | Rother                | 66.2  | 6.0 |
| 21UH | Wealden               | 54.0  | 5.5 |
| 22UB | Basildon              | 76.5  | 6.7 |
| 22UC | Braintree             | 61.2  | 6.7 |
| 22UD | Brentwood             | 53.0  | 6.2 |
| 22UE | Castle Point          | 65.9  | 6.4 |
| 22UF | Chelmsford            | 53.6  | 5.9 |
| 22UG | Colchester            | 64.7  | 6.4 |
| 22UH | Epping Forest         | 61.4  | 6.3 |
| 22UJ | Harlow                | 77.4  | 6.3 |
| 22UK | Maldon                | 60.5  | 6.4 |
| 22UL | Rochford              | 58.4  | 5.8 |
| 22UN | Tendring              | 81.2  | 6.8 |
| 22UQ | Uttlesford            | 48.6  | 6.4 |
| 23UB | Cheltenham            | 62.8  | 6.3 |
| 23UC | Cotswold              | 48.8  | 6.0 |
| 23UD | Forest of Dean        | 69.8  | 6.7 |
| 23UE | Gloucester            | 77.8  | 6.9 |
| 23UF | Stroud                | 57.5  | 6.3 |
| 23UG | Tewkesbury            | 56.0  | 6.0 |
| 24UB | Basingstoke and Deane | 56.0  | 6.4 |
| 24UC | East Hampshire        | 49.0  | 6.3 |
| 24UD | Eastleigh             | 56.4  | 6.2 |
| 24UE | Fareham               | 53.5  | 5.8 |
| 24UF | Gosport               | 69.7  | 7.0 |
| 24UG | Hart                  | 43.2  | 5.6 |
| 24UH | Havant                | 70.6  | 6.5 |
| 24UJ | New Forest            | 56.3  | 5.5 |
| 24UL | Rushmoor              | 62.7  | 6.7 |
| 24UN | Test Valley           | 52.3  | 5.9 |

|      |                           |       |     |
|------|---------------------------|-------|-----|
| 24UP | Winchester                | 46.2  | 5.6 |
| 26UB | Broxbourne                | 62.9  | 6.3 |
| 26UC | Dacorum                   | 56.4  | 6.4 |
| 26UD | East Hertfordshire        | 51.5  | 6.3 |
| 26UE | Hertsmere                 | 56.6  | 6.5 |
| 26UF | North Hertfordshire       | 56.8  | 6.7 |
| 26UG | St. Albans                | 51.6  | 5.9 |
| 26UH | Stevenage                 | 70.8  | 6.8 |
| 26UJ | Three Rivers              | 54.0  | 5.9 |
| 26UK | Watford                   | 66.2  | 7.3 |
| 26UL | Welwyn Hatfield           | 63.6  | 6.1 |
| 29UB | Ashford                   | 63.1  | 6.0 |
| 29UC | Canterbury                | 72.4  | 6.3 |
| 29UD | Dartford                  | 67.2  | 7.4 |
| 29UE | Dover                     | 78.1  | 6.9 |
| 29UG | Gravesham                 | 70.6  | 6.7 |
| 29UH | Maidstone                 | 59.0  | 6.3 |
| 29UK | Sevenoaks                 | 53.3  | 5.6 |
| 29UL | Shepway                   | 75.7  | 6.9 |
| 29UM | Swale                     | 73.6  | 7.1 |
| 29UN | Thanet                    | 89.4  | 7.1 |
| 29UP | Tonbridge and Malling     | 56.2  | 6.4 |
| 29UQ | Tunbridge Wells           | 55.3  | 6.2 |
| 30UD | Burnley                   | 111.1 | 8.1 |
| 30UE | Chorley                   | 83.0  | 7.4 |
| 30UF | Fylde                     | 77.0  | 6.7 |
| 30UG | Hyndburn                  | 111.6 | 8.1 |
| 30UH | Lancaster                 | 85.6  | 7.2 |
| 30UJ | Pendle                    | 104.1 | 7.3 |
| 30UK | Preston                   | 99.5  | 8.1 |
| 30UL | Ribble Valley             | 62.7  | 6.8 |
| 30UM | Rossendale                | 98.5  | 8.2 |
| 30UN | South Ribble              | 79.3  | 6.9 |
| 30UP | West Lancashire           | 86.1  | 7.6 |
| 30UQ | Wyre                      | 85.2  | 6.8 |
| 31UB | Blaby                     | 60.1  | 5.6 |
| 31UC | Charnwood                 | 64.4  | 6.4 |
| 31UD | Harborough                | 52.2  | 6.1 |
| 31UE | Hinckley and Bosworth     | 65.7  | 6.4 |
| 31UG | Melton                    | 52.0  | 6.6 |
| 31UH | North West Leicestershire | 74.0  | 6.7 |

|      |                              |       |     |
|------|------------------------------|-------|-----|
| 31UJ | Oadby and Wigston            | 62.8  | 6.1 |
| 32UB | Boston                       | 78.9  | 7.1 |
| 32UC | East Lindsey                 | 88.5  | 7.0 |
| 32UD | Lincoln                      | 86.3  | 7.4 |
| 32UE | North Kesteven               | 63.5  | 6.7 |
| 32UF | South Holland                | 72.0  | 6.5 |
| 32UG | South Kesteven               | 60.3  | 6.4 |
| 32UH | West Lindsey                 | 69.1  | 6.7 |
| 33UB | Breckland                    | 67.5  | 6.3 |
| 33UC | Broadland                    | 60.0  | 6.1 |
| 33UD | Great Yarmouth               | 87.4  | 7.1 |
| 33UE | King's Lynn and West Norfolk | 75.9  | 6.6 |
| 33UF | North Norfolk                | 67.3  | 5.8 |
| 33UG | Norwich                      | 90.1  | 6.4 |
| 33UH | South Norfolk                | 58.7  | 5.6 |
| 34UB | Corby                        | 88.9  | 8.2 |
| 34UC | Daventry                     | 55.3  | 6.7 |
| 34UD | East Northamptonshire        | 62.1  | 6.5 |
| 34UE | Kettering                    | 67.1  | 6.7 |
| 34UF | Northampton                  | 73.1  | 7.0 |
| 34UG | South Northamptonshire       | 51.4  | 6.0 |
| 34UH | Wellingborough               | 73.2  | 6.9 |
| 35UB | Alnwick                      | 68.9  | 6.5 |
| 35UC | Berwick-upon-Tweed           | 72.4  | 6.6 |
| 35UD | Blyth Valley                 | 103.0 | 8.1 |
| 35UE | Castle Morpeth               | 69.9  | 6.6 |
| 35UF | Tynedale                     | 64.6  | 6.8 |
| 35UG | Wansbeck                     | 112.6 | 8.2 |
| 36UB | Craven                       | 60.9  | 6.1 |
| 36UC | Hambleton                    | 60.0  | 6.0 |
| 36UD | Harrogate                    | 57.5  | 6.2 |
| 36UE | Richmondshire                | 60.0  | 6.4 |
| 36UF | Ryedale                      | 58.9  | 5.5 |
| 36UG | Scarborough                  | 80.4  | 6.8 |
| 36UH | Selby                        | 69.2  | 6.7 |
| 37UB | Ashfield                     | 100.3 | 7.7 |
| 37UC | Bassetlaw                    | 91.8  | 7.6 |
| 37UD | Broxtowe                     | 76.7  | 6.9 |
| 37UE | Gedling                      | 72.8  | 6.5 |
| 37UF | Mansfield                    | 109.5 | 7.4 |
| 37UG | Newark and Sherwood          | 77.6  | 7.1 |



|      |                         |      |     |
|------|-------------------------|------|-----|
| 37UJ | Rushcliffe              | 58.8 | 6.4 |
| 38UB | Cherwell                | 57.1 | 6.5 |
| 38UC | Oxford                  | 67.9 | 6.4 |
| 38UD | South Oxfordshire       | 47.9 | 6.0 |
| 38UE | Vale of White Horse     | 49.7 | 5.8 |
| 38UF | West Oxfordshire        | 51.5 | 5.9 |
| 39UB | Bridgnorth              | 64.0 | 6.8 |
| 39UC | North Shropshire        | 67.9 | 6.5 |
| 39UD | Oswestry                | 70.5 | 7.1 |
| 39UE | Shrewsbury and Atcham   | 68.1 | 6.3 |
| 39UF | South Shropshire        | 66.6 | 5.9 |
| 40UB | Mendip                  | 63.7 | 6.1 |
| 40UC | Sedgemoor               | 73.6 | 6.5 |
| 40UD | South Somerset          | 62.4 | 5.7 |
| 40UE | Taunton Deane           | 66.5 | 6.1 |
| 40UF | West Somerset           | 69.1 | 5.5 |
| 41UB | Cannock Chase           | 94.9 | 7.6 |
| 41UC | East Staffordshire      | 70.0 | 7.6 |
| 41UD | Lichfield               | 66.4 | 7.2 |
| 41UE | Newcastle-under-Lyme    | 90.1 | 7.1 |
| 41UF | South Staffordshire     | 64.6 | 6.8 |
| 41UG | Stafford                | 66.7 | 6.7 |
| 41UH | Staffordshire Moorlands | 76.2 | 7.1 |
| 41UK | Tamworth                | 88.5 | 7.3 |
| 42UB | Babergh                 | 56.0 | 5.9 |
| 42UC | Forest Heath            | 63.2 | 6.5 |
| 42UD | Ipswich                 | 77.0 | 6.6 |
| 42UE | Mid Suffolk             | 53.1 | 6.1 |
| 42UF | St. Edmundsbury         | 57.7 | 6.3 |
| 42UG | Suffolk Coastal         | 56.9 | 5.9 |
| 42UH | Waveney                 | 77.7 | 6.5 |
| 43UB | Elmbridge               | 45.3 | 5.7 |
| 43UC | Epsom and Ewell         | 48.6 | 5.9 |
| 43UD | Guildford               | 50.1 | 5.4 |
| 43UE | Mole Valley             | 46.0 | 5.7 |
| 43UF | Reigate and Banstead    | 50.7 | 6.8 |
| 43UG | Runnymede               | 52.7 | 6.4 |
| 43UH | Spelthorne              | 56.5 | 6.3 |
| 43UJ | Surrey Heath            | 45.8 | 6.2 |
| 43UK | Tandridge               | 50.0 | 6.1 |
| 43UL | Waverley                | 46.9 | 5.7 |

|      |                       |      |     |
|------|-----------------------|------|-----|
| 43UM | Woking                | 52.4 | 6.0 |
| 44UB | North Warwickshire    | 79.4 | 7.1 |
| 44UC | Nuneaton and Bedworth | 87.9 | 7.5 |
| 44UD | Rugby                 | 65.0 | 6.6 |
| 44UE | Stratford-on-Avon     | 53.6 | 6.2 |
| 44UF | Warwick               | 61.6 | 6.4 |
| 45UB | Adur                  | 68.0 | 6.0 |
| 45UC | Arun                  | 65.5 | 6.4 |
| 45UD | Chichester            | 51.8 | 5.8 |
| 45UE | Crawley               | 67.4 | 6.5 |
| 45UF | Horsham               | 46.7 | 5.6 |
| 45UG | Mid Sussex            | 47.7 | 6.0 |
| 45UH | Worthing              | 69.2 | 6.6 |
| 46UB | Kennet                | 51.8 | 5.8 |
| 46UC | North Wiltshire       | 53.8 | 6.3 |
| 46UD | Salisbury             | 55.8 | 6.1 |
| 46UF | West Wiltshire        | 61.1 | 6.1 |
| 47UB | Bromsgrove            | 60.2 | 6.5 |
| 47UC | Malvern Hills         | 62.2 | 6.2 |
| 47UD | Redditch              | 76.8 | 6.8 |
| 47UE | Worcester             | 71.8 | 6.9 |
| 47UF | Wychavon              | 59.2 | 6.2 |
| 47UG | Wyre Forest           | 73.6 | 7.0 |

**Excluded local authority areas**

We excluded City of London and Isles of Scilly (which had very small numbers of deaths), Easington (as the two age standardised self reported health rates for this area were about four times the standard deviation for England and are either erroneous or highly atypical), Kensington and Chelsea (which had a census imputation rate of 64%), and Manchester and Westminster (where the reliability of the census returns has been seriously disputed).
